# Supplementary material for: Human Cytomegalovirus (HCMV) Reactivation in the Mammary Gland Induces a Proinflammatory Cytokine Shift in Breast Milk
Source: MDPI journal article supplement (doi:10.3390/microorganisms8020289), 2020-02-20
Supplement: s1 [file s1]

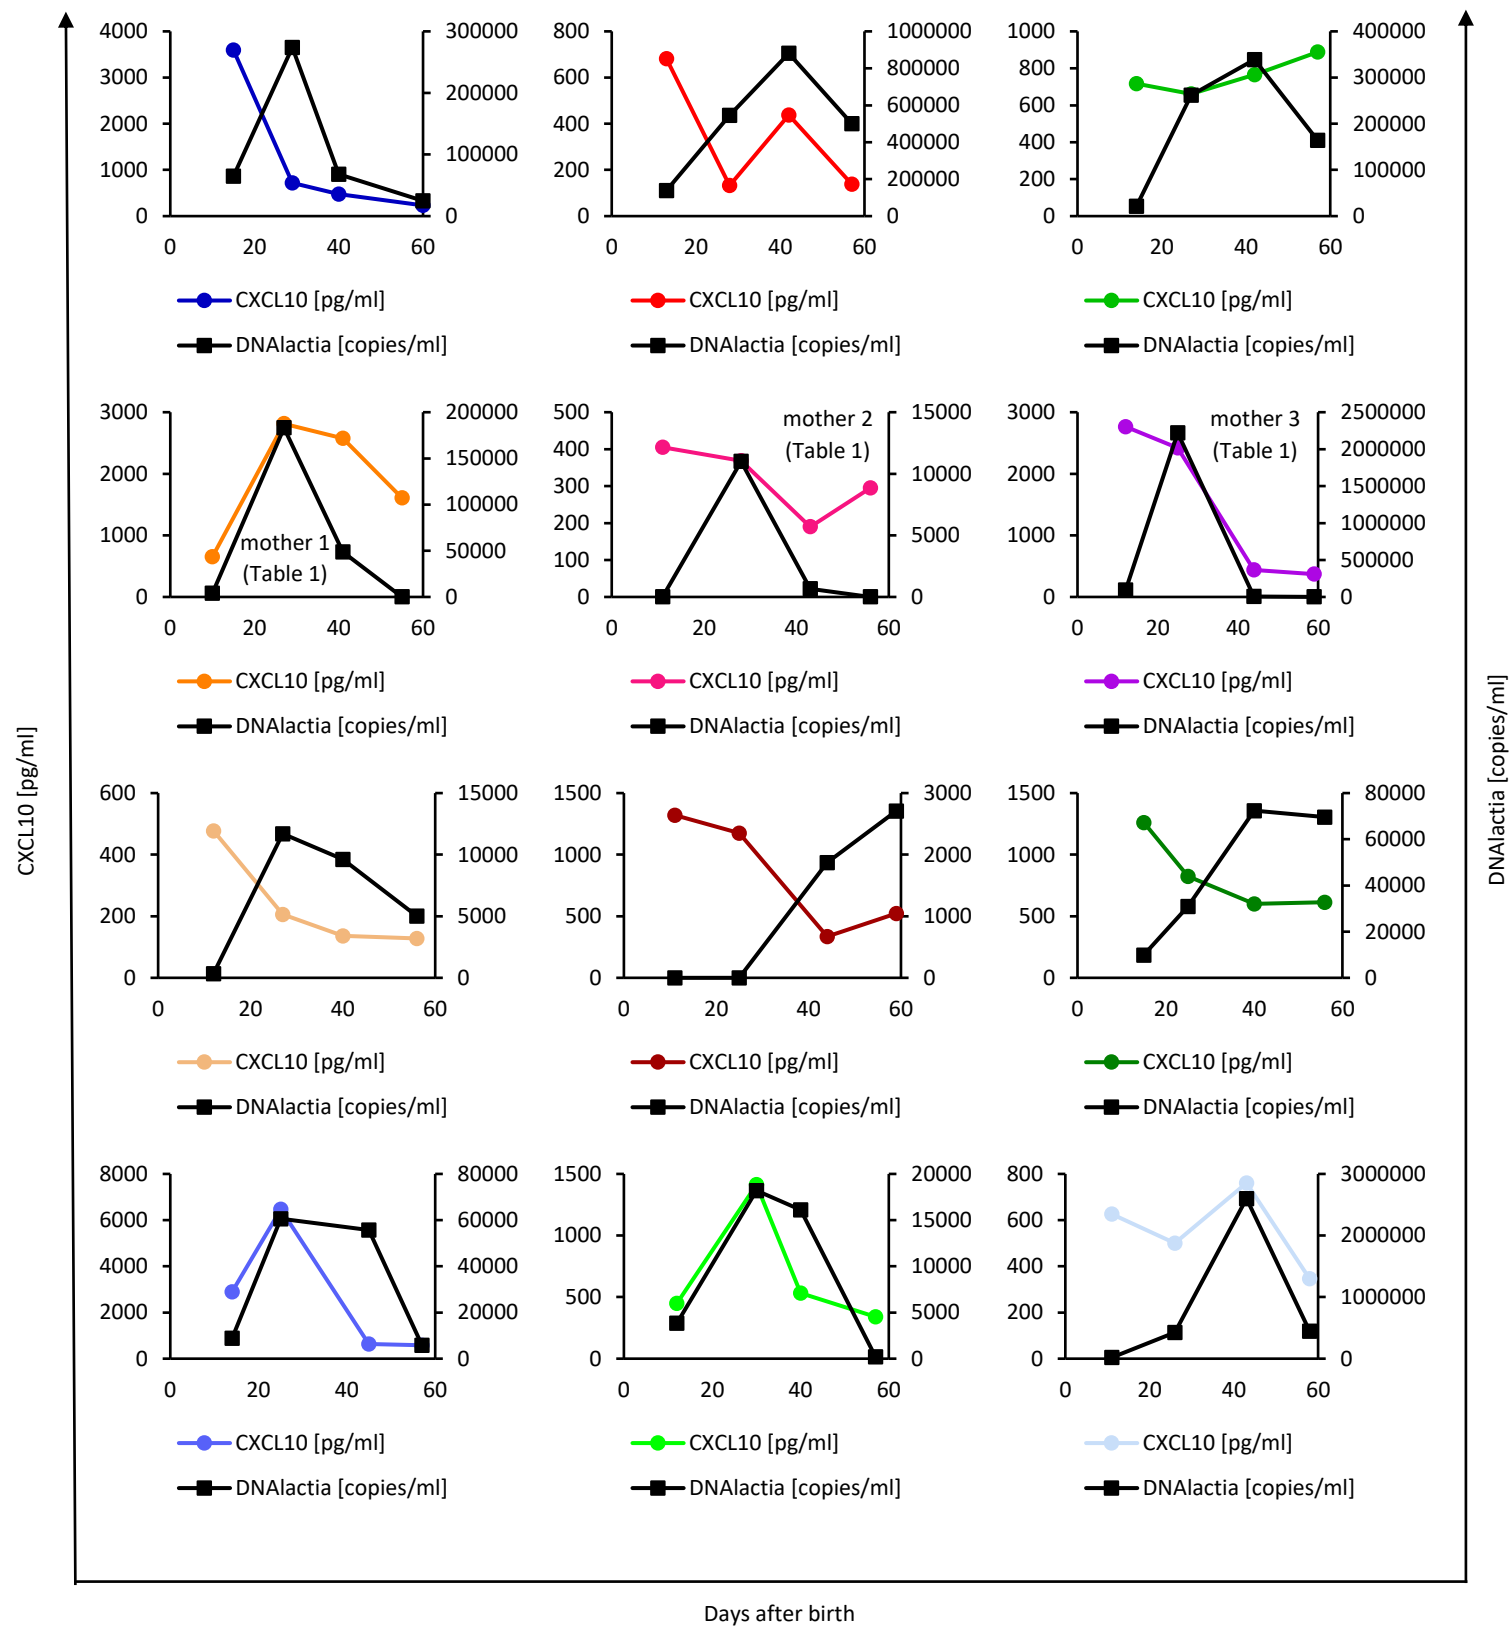

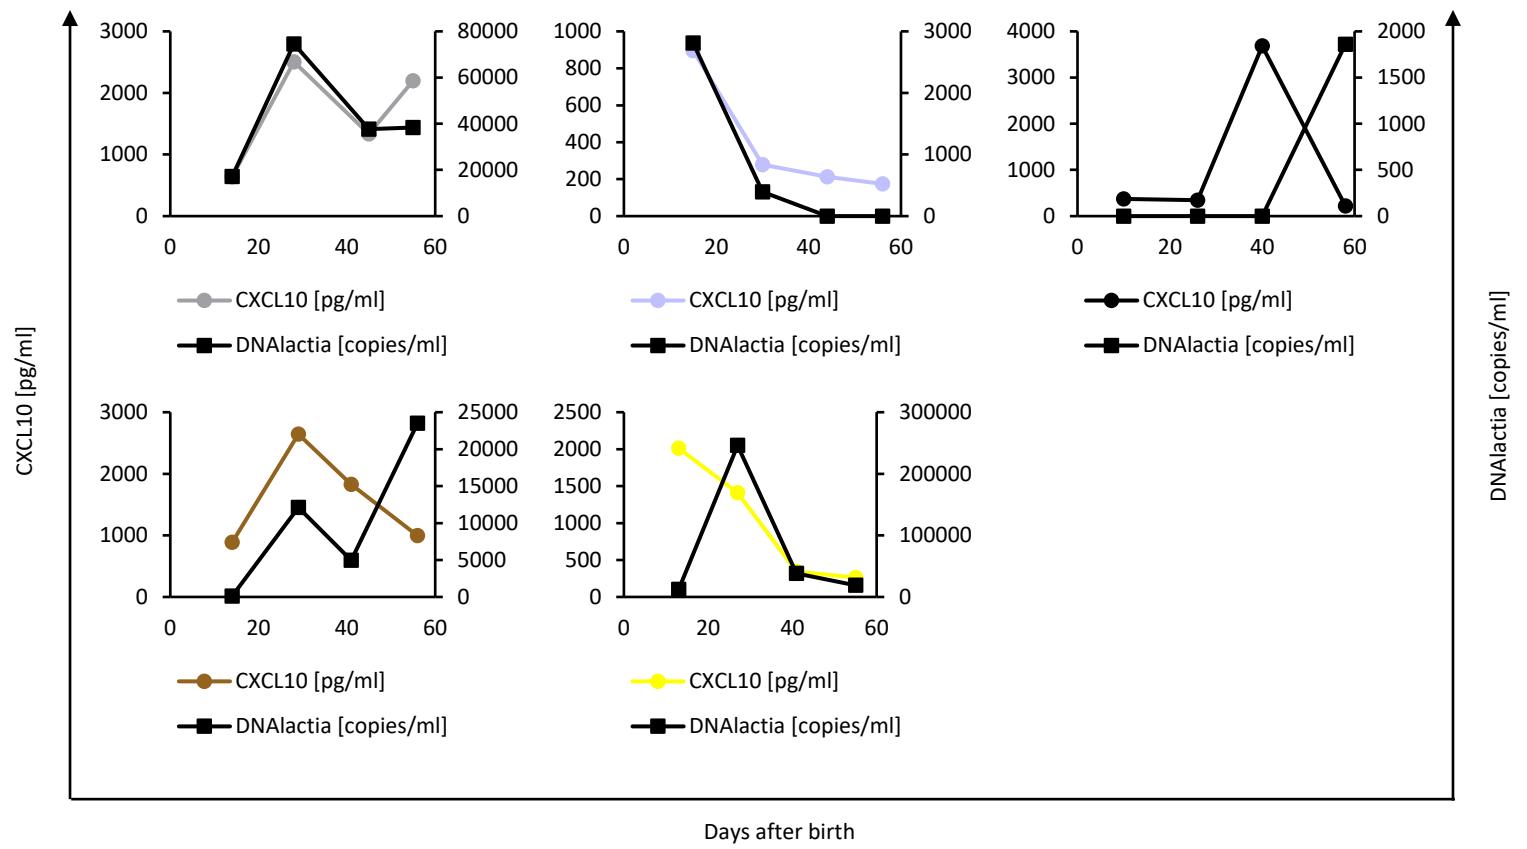

Figure S3: Longitudinal CXCL10 courses in context of HCMV DNA load [16] in milk whey of 17 seropositive and reactivating mothers during an observational period of two months postpartum. Color coding corresponds to Figure 4a.
