# Supplementary material for: Human Cytomegalovirus (HCMV) Reactivation in the Mammary Gland Induces a Proinflammatory Cytokine Shift in Breast Milk
Source: MDPI journal article supplement (doi:10.3390/microorganisms8020289), 2020-02-20
Supplement: s1 [file s1]

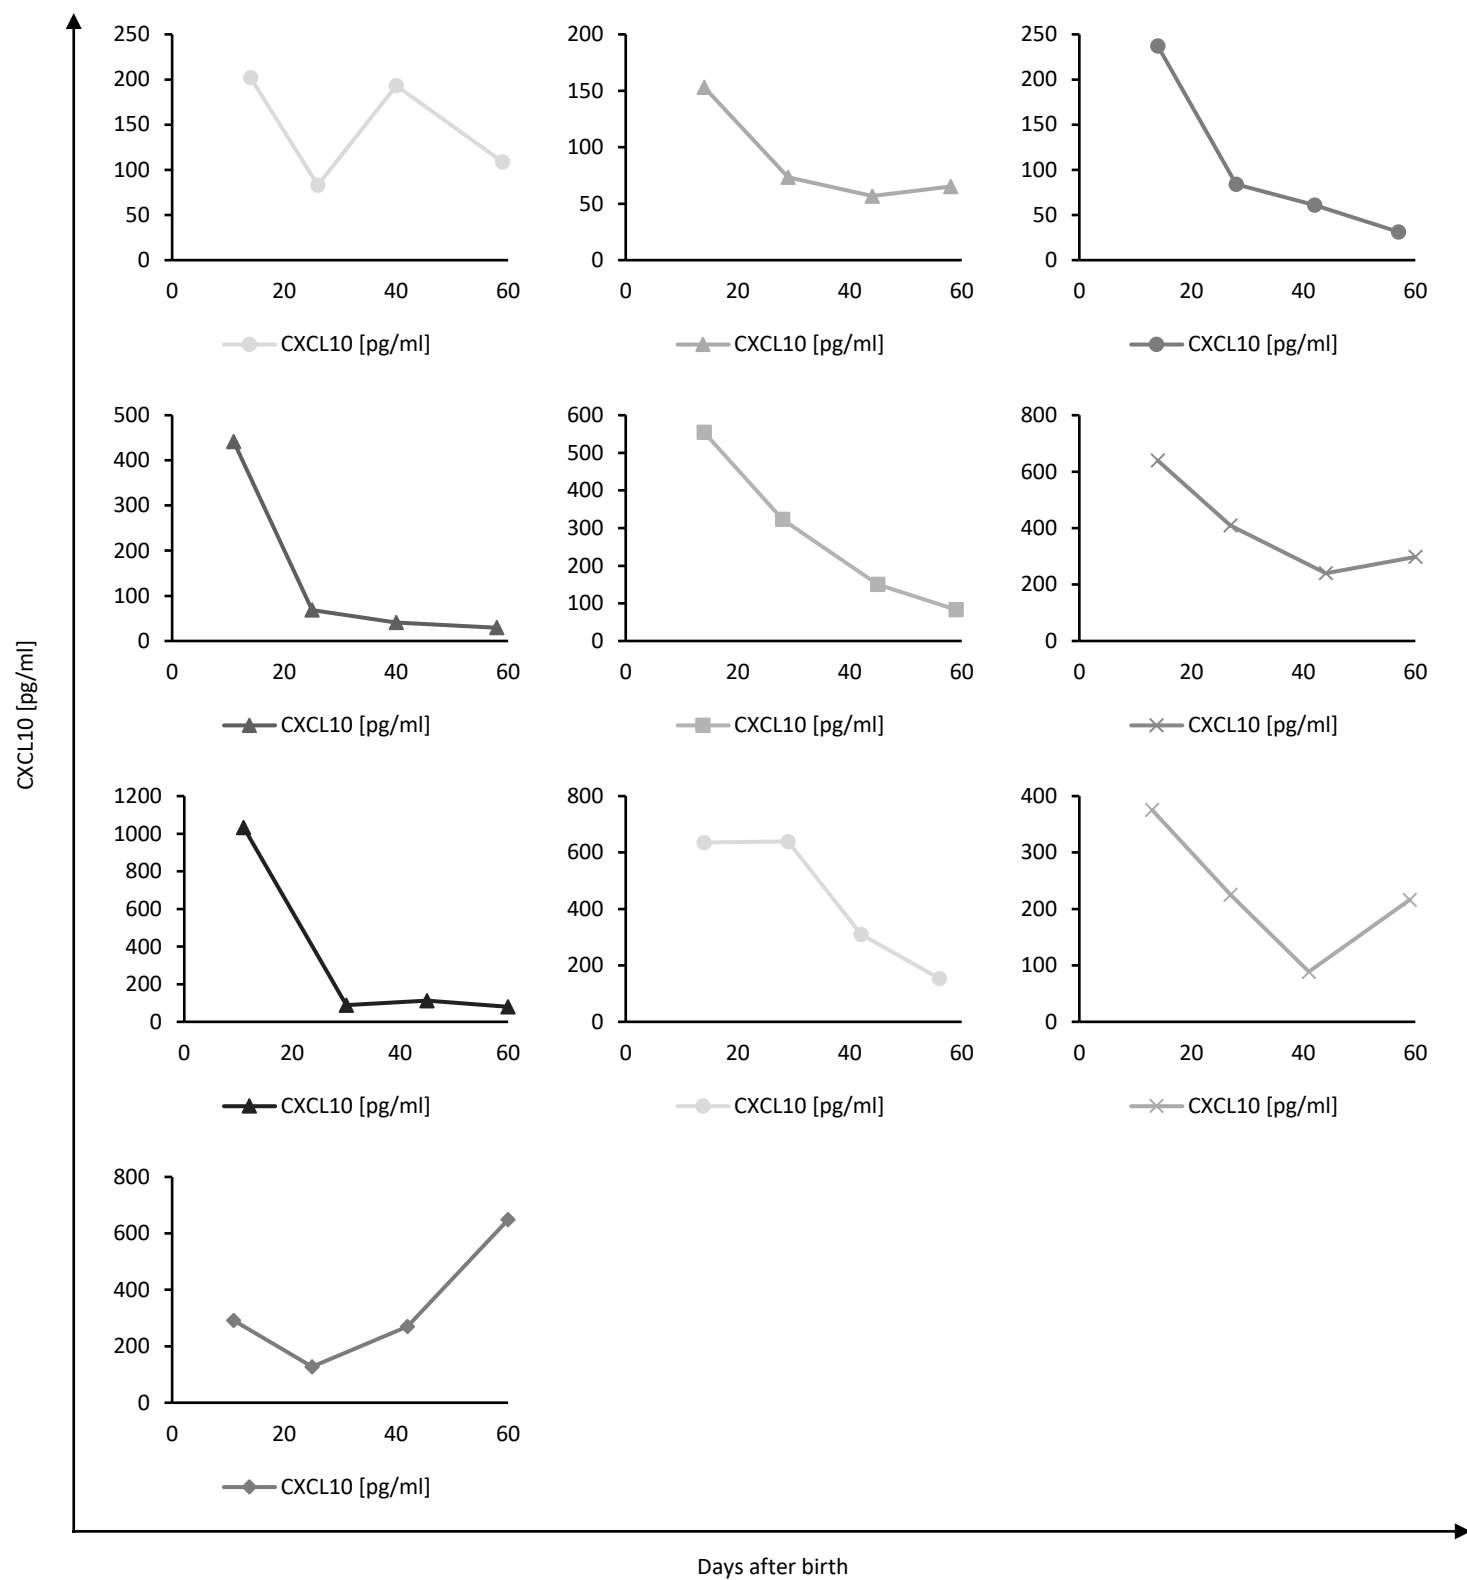

Figure S1: Longitudinal CXCL10 courses in milk whey of 10 seronegative mother during an observational period of two months postpartum. Color coding corresponds to Figure 4a.
